# Supplementary material
Source: publisher site journal article supplement (https://www.spandidos-publications.com/2930/downloadSupplementary)
Supplement: Supplementary file 1 [file downloadSupplementary]

Figure S1. Effects of BSGLP or RSGLP on cell viability in non-cancerous GES-1 cells. Cells were treated with (A) BSGLP or (B) RSGLP for 24, 48 or 72 h, and cell viability was assessed using MTT assay. \* $P<0.05$ , \*\* $P<0.01$ , \*\*\* $P<0.001$  vs. control. BSGLP, sporoderm-broken spores of *G. lucidum* polysaccharide; RSGLP, sporoderm-removed spores of *G. lucidum* polysaccharide.

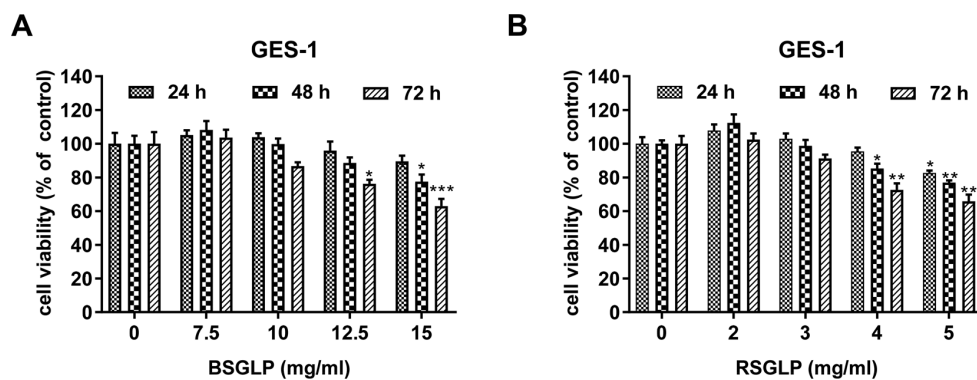

Figure S2. Western blotting of LC3-II and p62 expression in MKN28 and NCI-N87 cells. MKN28 and NCI-N87 cells were treated with 0, 2.0, 2.5, 3.0 or 3.5 mg/ml RSGLP for 24 h, respectively. RSGLP, sporoderm-removed spores of *G. lucidum* polysaccharide.

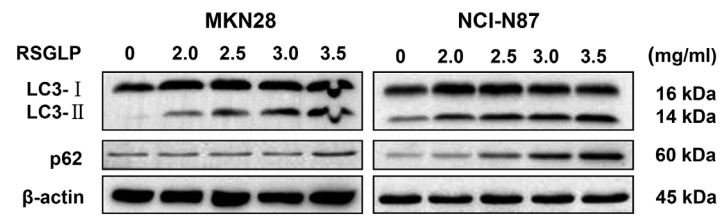

Figure S3. Autophagosome accumulation and autophagy flux disruption further increases RSGLP-induced PARP cleavage in AGS cells. PARP and cleaved-PARP expression as determined by Western blotting. AGS cells were treated with RSGLP (3 mg/ml) with or without CQ (5  $\mu$ M) or Rap (2  $\mu$ M) for 36 h. RSGLP, sporoderm-removed spores of *G. lucidum* polysaccharide; CQ, chloroquine; Rap, rapamycin.

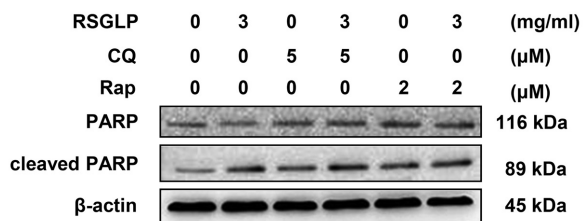

Table SI. The IC<sub>50</sub> of BSGLP and RSGLP in non-cancerous GES-1, and cancerous MKN28, NCI-N87, and AGS gastric cell lines.

| Group | Hour | IC <sub>50</sub> (mg/ml) <sup>a</sup> |            |            |            |
|-------|------|---------------------------------------|------------|------------|------------|
|       |      | GES-1                                 | MKN28      | NCI-N87    | AGS        |
| BSGLP | 24 h | -                                     | 18.58±2.74 | 15.98±2.45 | 13.59±2.22 |
|       | 48 h | 36.69±1.76                            | 15.59±1.53 | 13.28±2.26 | 11.83±1.54 |
|       | 72 h | 29.92±1.61                            | 11.83±2.74 | 10.07±2.11 | 9.51±1.67  |
| RSGLP | 24 h | -                                     | 5.20±1.02  | 6.55±1.16  | 4.73±2.95  |
|       | 48 h | 20.45±2.53                            | 4.39±1.27  | 4.89±1.67  | 3.50±2.28  |
|       | 72 h | 17.04±1.07                            | 3.38±1.09  | 3.29±1.76  | 2.29±1.33  |

<sup>a</sup>Values are mean ± SE of three independent experiments (n=10/plate, 3 plates). BSGLP, sporoderm-broken spores of *G. lucidum* polysaccharide; RSGLP, sporoderm-removed spores of *G. lucidum* polysaccharide.
